# Supplementary material for: Ni-complex-catalysed addition polymerisation of 2-phenyl-1-methylenecylopropane to afford a polymer with cyclopropylidene groupsElectronic supplementary information (ESI) available: full details of the experimental procedures, DSC and TG profile of I. See http://www.rsc.org/suppdata/cc/b1/b111697e/
Source: Royal Society of Chemistry journal article supplement (doi:10.1039/b111697e), 2002-02-25
Supplement: b111697e.doc [file b111697e.doc]

**Supplementary data**

**Ni complex-catalysed addition polymerisation**

**of 2-phenyl-1-methylenecylopropane**

**to afford polymer with cyclopropylidene groups**

Daisuke Takeuchi and Kohtaro Osakada*

**1. Experimental Procedures and Results**

**1.1 General, Measurement, and Materials.**

Manipulations of nickel complexes were carried out under nitrogen or argon atmosphere using standard Schlenk techniques. Anhydrous tetrahydrofuran (THF) was refluxed over sodium benzophenone ketyl and fractionally distilled in an Ar atmosphere. Deuterated chloroform (CDCl3) was used as received. [(**-allyl)NiBr]2 was prepared according to the reported procedure.[[1]](#footnote-2) 2-Phenyl-1-methylenecyclopropane was purchased from Lancaster co. ltd or prepared according to the reported procedure.Error: Reference source not found

NMR spectra (1H and 13C) were recorded on a Varian Mercury 300 or JEOL JNM-500 spectrometer. The peaks were referenced to CHCl3 in the CDCl3 solvent (**7.26) for 1H and CDCl3 (**77.0) for 13C. Gel permeation chromatography (GPC) was performed at 40 °C on a JASCO high-speed liquid chromatograph system equipped with a differential refractometer detector and a variable-wavelength UV-vis detector, using tetrahydrofuran as eluent at a flow rate of 1.0 mL min-1 with a Shodex-806L column. The molecular weight calibration curve was obtained by using standard polystyrenes; *M*n (*M*w/*M*n): 1,110,000 (1.08), 707,000 (1.05), 354,000 (1.02), 189,000 (1.04), 98,900 (1.01), 37,200 (1.01), 17,100 (1.01), 9,830 (1.02), 5,870 (1.02), 2,500 (1.05), 870 (1.10), and 500 (1.14). DSC and TG were recorded on Seiko DSC6200R and Seiko TG/DTA6200R, respectively.

**1.2 Preparation of 2-Phenyl-1-methylenecyclopropane.**[[2]](#footnote-3)

2-Phenyl-1-methylenecyclopropane was synthesised according to a reported procedure.1 To a 500-mL round bottomed flask attached to a three-way stopcock, containing a toluene solution (180 mL) of sodium bis(trimethylsilyl)amide (300 mmol, 55 g), anhydrous styrene (150 mmol, 17.2 mL) and a magnetic stirring bar under N2 was added dropwise 1,1-dibromoethane (135 mmol, 12.1 g) at 0 °C, and the mixture was stirred at 25 °C. After 24-h stirring, the reaction mixture was treated with NH4Cl aq., washed with water, and extracted with ether. After dried over MgSO4, the volatile fraction was evaporated and the residue was distilled to afford *syn*/*anti*-1-bromo-1-methyl-2-phenylcyclopropane in 81.7% yield (21.9 g). 1H NMR (CDCl3): ** 1.34 and 1.71 (3H, s, CH3), 1.2-1.6 (2H, m, CH2), 2.18 and 2.67 (2H, m, CH), and 7.2-7.36 (5H, m, Ph).

It was converted into 2-phenyl-1-methylenecyclopropane as described below. To a 200-mL round bottomed flask attached to a three-way stopcock, containing a dimethylsulfoxide solution (80 mL) of potassium *t*-butoxide (63.0 mmol, 7.07 g), and a magnetic stirring bar under N2 was added dropwise *syn*/*anti*-1-bromo-1-methyl-2-phenylcyclopropane (58.0 mmol, 12.2 g) at 0 °C, and the mixture was stirred at 25 °C. After stirring for 24 h, the reaction mixture was treated with NH4Cl aq., washed with water, and extracted with ether. After dried over MgSO4, the volatile fraction was evaporated and the residue was distilled to afford 2-phenyl-1-methylenecyclopropane in 90% yield (6.82 g). 1H NMR (CDCl3): **1.32 (1H, m, CH2), 1.80 (1H, m, CH2), 2.69 (1H, m, CH), 5.65 (2H, m, =CH2), and 7.2-7.4 (5H, m, Ph).

**1.3 Polymerisation of 2-Phenyl-1-methylenecyclopropane.**

Typically, to a 25-mL Schlenk flask containing a THF solution (1 mL) of [(**-allyl)NiBr]2 (0.0125 mmol, 0.0044 g) and a magnetic stirring bar under Ar, was added 2-phenyl-1-methylenecyclopropane (1.75 mmol, 0.228 g) by a syringe, and the mixture was stirred at room temperature. The reaction mixture was quenched by adding MeOH. The produced polymer was isolated by pouring chloroform solution of the polymer into a large amount of methanol. The formed white precipitates formed were collected and dried *in vacuo* at 25 °C. **I**: 1H NMR (CDCl3): **0.0-2.5 (5H, br, CH, CH2), and 6.3-7.5 (5H, br, Ph). 13C{1H} NMR (CDCl3): **12-22 (C, CH2 (cyclopropyl)), 22-30 (CH), 30-50 (CH2), 125.8 (*p*-Ph), 128.0, 128.8 (*o*-, *m*-Ph), and 139.5 (*ipso*-Ph).

**1.4 Preparation of 13C-Labelled 2-Phenyl-1-methylenecyclopropane**

To a suspension of Ph3P (70 mmol, 18.4 g) in toluene (150 mL) was added 13CH3I (70 mmol, 10 g), to give a white suspension which was stirred for 12 h. The separated white solid was collected by filtration, washed with hexane, and dried *in vacuo* to afford 13CH3PPh3I in quantitative yield. 1H NMR (CDCl3): ** 3.22 (3H, dd, *J*C-H = 135 Hz, *J*P-H = 13.2 Hz, CH3) and 7.6-7.9 (15H, m, Ph). 13C{1H} NMR (CDCl3): ** 11.7 (d, *J*P-C = 56.7 Hz, CH3). 31P NMR (CDCl3): ** 22.3 (d, *J*C-P = 56.7 Hz).

It was converted into styrene-**-13C as follows. To a 300-mL round-bottomed flask equipped with a three-way stopcock, containing ether solution (160 mL) of 13CH3Ph3PI (70 mmol, 0.34 g) and a magnetic stirring bar under Ar, was added *t*BuOK (7.9 g) and the mixture was stirred for 3 h, whereupon bright-yellow precipitates formed. To the reaction mixture was successively added ether (160 mL) and benzaldehyde (77 mmol, 7.8 mL) and stirred at 25 °C for 1 h and 65 °C for 12 h. After the precipitates were filtered off, the resulting clear solution was washed with water, dried over MgSO4, and distilled under reduced pressure to afford styrene-**-13C in 59% yield (4.3 g, 41 mmol). 1H NMR (CDCl3): **5.18 (1H, dd, *J*C-H = 160 Hz, *J*H-H = 11.1 Hz, CH2), 5.72 (1H, dd, *J*C-H = 153 Hz, *J*H-H = 17.4 Hz, CH2), 6.67 (1H, dd, *J*H-H = 17.4 Hz, *J*H-H = 11.1 Hz, CH), and 7.1-7.4 (5H, m, Ph). 13C{1H} NMR (CDCl3): ** 113.3 (CH2).

13C-Labelled 2-phenyl-1-methyleneclopropane (**2-13C**) was synthesised similar to **I** using styrene-**-13C in 47% yield. 1H NMR (CDCl3): **1.05 and 1.59 (1H, m, CH2), 1.57 and 2.10 (1H, m, CH2), 2.69 (1H, m, CH), 5.70 (2H, m, =CH2), and 7.2-7.4 (5H, m, Ph). 13C{1H} NMR (CDCl3): ** 14.6 (CH2).

1. . M. F. Semmelhack and P. M. Helquist, *Org. Synth.*, 1972, **52**, 115. [↑](#footnote-ref-2)
2. . S. Arora and P. Binger, *Synthesis*, 1974, 801. [↑](#footnote-ref-3)
